# Supplementary material for: Body mass index and childhood symptoms of depression, anxiety, and attention-deficit hyperactivity disorder: a within-family Mendelian randomization study
Source: bioRxiv or medRxiv preprint supplement (doi:10.1101/2021.09.17.21263612), 2022-10-19
Supplement: Supplementary file [file media-2.pdf]

## **Supplementary material (additional methods, figures, and small tables)**

*Contents of this file:*

Supplementary Methods:

1. MoBa study details and ethical approval
2. Genotyping and imputation
3. Genetic quality control
4. Multiple imputation of phenotypes
5. Polygenic score construction
6. Model equations

Supplementary Results:

1. Comparison of analytic sample and excluded participants

Supplementary Figures:

1. Flow chart of inclusion and exclusion of MoBa participants into the study sample

Supplementary Tables:

5. Descriptive statistics of full MoBa sample
6. Descriptive statistics of analytic sample, unimputed data
7. BMI and symptoms of depression, anxiety, and ADHD at age 8, adult BMI PGS
8. BMI and symptoms of depression, anxiety, and ADHD at age 8, childhood BMI PGS
9. Associations of polygenic scores within parental pairs
10. BMI and symptoms of depression, anxiety, and ADHD at age 8, adult BMI PGS, log-transformed outcomes
11. BMI and symptoms of depression, anxiety, and ADHD at age 8, childhood BMI PGS, log-transformed outcomes
12. Robustness checks for classic MR models
13. Robustness checks for within-family MR (within-family MR) models
14. BMI and symptoms of depression, anxiety, and ADHD at age 8 in MoBa, adult BMI PGS, complete-case analysis
15. BMI and symptoms of depression, anxiety, and ADHD at age 8 in MoBa, childhood BMI PGS, complete-case analysis
16. Multivariable-adjusted associations of BMI quintiles with symptoms of depression, anxiety, and ADHD at age 8 in MoBa

*The following large tables are provided in a separate excel file:*

1. SNPs used in the polygenic score for adult BMI
2. SNPs used in the polygenic score for childhood BMI
3. SNPs used in the polygenic score for depression
4. SNPs used in the polygenic score for ADHD

## Supplementary Methods

### 1. MoBa study details and ethical approval

This study is based on the Norwegian Mother, Father and Child Cohort Study (MoBa) and uses data from the Medical Birth Registry of Norway (MBRN). The MBRN is a national health registry containing information about all births in Norway. MoBa is supported by the Norwegian Ministry of Health and Care Services and the Ministry of Education and Research. We are grateful to all the participating families in Norway who take part in this on-going cohort study.

The establishment of MoBa and initial data collection was based on a license from the Norwegian Data Protection Agency and The Regional Committees (REC) for Medical and Health Research Ethics. The REC South East Norway, one of four in Norway, was the ethical committee that evaluated the ethics of this study. Approval from the REC was granted (2016/1702). The MoBa cohort is now based on regulations related to the Norwegian Health Registry Act. Informed consent was obtained from each MoBa participant upon recruitment, which included consent to link to the MBRN.

### 2. Genotyping and imputation

This data used in this analysis is derived from a cohort of genotyped samples from four MoBa batches (n samples=98,110). 33,047 individuals were genotyped in the NORMENT samples were genotyped at deCODE genetics, Reykjavik Iceland (Illumina HumanOmniExpress-24v1.0, Illumina InfiniumOmniExpress-24v1.2, & Illumina Global Screening Array MD v.1.0 + 50k custom OmniExpress overlap content array), 26,680 were genotyped in the ROTTERDAM sample at ERASMUS MC, Rotterdam, Netherlands (Illumina Global Screening Array MD v.1.0 array), and 5215 were sampled in the TED samples at deCODE genetics (Illumina InfiniumOmniExpress-24v1.2), and 32,886 were sampled in the HARVEST sample at Genomics Core Facility, Trondheim, Norway (Illumina HumanCoreExome12v1.1 & Illumina HumanCoreExome24v1.0). Pre-imputation QC, phasing and imputation are described elsewhere:

<https://github.com/folkehelseinstituttet/mobagen/wiki/Projects-that-have-contributed-to-MoBa-Genetics>.

### 3. Genetic quality control

Individuals with sex-mismatch (derived by comparing genetic sex and reported sex) or individuals with sex-chromosome aneuploidy or those that were not linkable with the phenotypic data were excluded from the analysis (n=508). We checked the dataset for Mendelian errors using PLINK's --mendel command with thresholds of 1% and 5% for the trio and variant error rate respectively. This excluded 129 individuals and 1293 variants. On average these variants were less precisely imputed, mean INFO=0.88 versus mean INFO=0.97 for the rest of the SNPs.

3,061 individuals were genotyped twice, and 52 individuals genotyped 3 times. We checked the concordance of SNPs within pairs of duplicated samples, and 2 samples, that were indicated as duplicates by the MoBa data, had very low concordance ( $\pi_{\hat{}}$ <0.03), and were excluded. The remaining individuals had high concordance ( $\pi_{\hat{}}$ >0.8). Note there were some 2,474 pairs of samples that had concordance between 0.74 and 0.98. These individuals are almost certainly the same individuals and are unlikely to represent sample contamination (this would have been picked up at the genotype calling stage). This heterogeneity is therefore likely due to genotype samples for the same individuals being combined from different chips which had not been imputed to the same standard. We excluded 140,767 SNPs which were discordant for more than 5% of duplicated samples. One individual from each pair of duplicates was then dropped at random with a seed.

We restricted the sample to individuals of 'European' ancestry using the first 2 principal components provided of the MoBa data. The principal components were calculated by merging the MoBa data with the 1000g reference panel and projecting the 1000g PCs onto the MoBa data. We then compared the PC values in the MoBa samples versus each of the populations included in the reference panel. We excluded samples if they had values of PC1 and PC2 that were within the range of the non-European samples in 1000g reference panel, leading to the exclusion of 668 non-European samples.

Estimated kinship coefficients using KING(1) with age to the nearest year included as a covariate identified 86,175 pairs of known related individuals from the pedigree and a further 10,769 unknown related individuals. Parental relationships were updated based on KING results. Before running KING, we restricted SNPs to those with MAF>0.10 and a linkage-disequilibrium R<sup>2</sup> of >0.9. KING estimates the relationships of all the individuals in the datasets and reconstructs families. The output is a list of family and within family IDs. KING updated family IDs for 24,022 individuals, and parental relationships for 21,361 individuals. Samples were flagged for exclusion if newly assigned relationships appeared to be errors (375 samples). This included where: parents were less than 15 years older than children, both parents in a family were of the same sex, individuals were identified as MZ twins but linked to different pregnancies, and siblings had different parents or an age gap of more than 25 years. We also flagged for exclusion parent-offspring pairs where the mother or father as identified by KING was different to the genotyped individual specified in the pedigree. This category will include both cases of false paternity and sample mix-ups.

Separately within parents and children, we identified variants in high linkage equilibrium (i.e. independent variants) using the parameters --indep-pairwise 3000, 1500 and 0.1. Using the 55,637 variants remaining, we calculated the first 20 PCs using --pca in PLINK for the parents and offspring separately using the 1000 genomes reference panel.

#### 4. Multiple imputation

Multiple imputation by chained equations was performed in STATAv16 to estimate missing phenotypic information for the 26,379 trios with complete genetic data. 100 imputed datasets were produced and analysis across these datasets conducted with STATA's mi estimate commands. The imputation model included all BMI variables used in the main analyses (child's BMI at age 8, mother's pre-pregnancy BMI and father's BMI as reported at 17 weeks gestation, child's sex) and a range of auxiliary variables including BMI measurements from other timepoints (child's BMI at age 5 and age 7 and mother's BMI from the 6<sup>th</sup> questionnaire), mother's and father's smoking status reported at 17 weeks gestation, mother's and father's depressive/anxiety symptoms (using selected items from the 25-item Hopkins Checklist(7)), and ADHD symptoms (from the 6-item adult ADHD self-report scale(8)), and family socioeconomic characteristics, including parental educational qualifications and categorical variables of income and subjective financial strain. Variables from the birth registry file were also included as auxiliary variables: the mother's parity and marital status, the age of the mother and father, and the child's birthweight and length. Approximately normally-distributed continuous variables including BMI were imputed using truncated regression, specifying as upper and lower limits the smallest and largest values observed in the full MoBa sample. Ordered categorical variables were imputed with ordered logistic regression. There was no missingness in genetic information within the analytic sample. Polygenic scores for adult BMI, childhood BMI, depression, ADHD, and educational attainment were included on the right-hand side of the imputation equations, along with batch indicators and the 20 principal components of ancestry for all individuals. Continuous variables which were not normally-distributed were imputed with predictive mean matching, specifying knn(10). This included child's depressive and anxiety

symptoms at age 8 (SMFQ and SCARED summary scores), mother's and father's depressive/anxiety symptoms at 17 weeks gestation (summary scores based on items from the 25-item Hopkins Checklist(7), and mother's and father's ADHD symptoms from the 6-item adult ADHD self-report scale(Kessler et al., 2005). To facilitate analysis of ADHD inattention and hyperactivity subscales, the two subscales were imputed, again with predictive mean matching, and the full scale calculated post-imputation with mi passive. An earlier measure of the child's ADHD symptoms at 5yrs, based on questions from the Short-Form Conners Parent Rating Scale(Kumar & Steer, 2003), was included as an auxiliary variable.

## 5. Polygenic score construction

Beginning with the full GWAS results for each phenotype(2–5), R was used to subset SNPs included in full GWAS results to SNPs also available in the quality controlled MoBa data. From SNPs available in both, independent genome-wide significant associations were identified by clumping in MRBase, specifying  $r=0.01$  and  $p<5.0\times 10^{-8}$  (6). First subsetting to SNPs available in MoBa and then clumping within these avoids the need for an additional step identifying proxy SNPs. This left 961 SNPs associated with adult BMI, and 323 associated with childhood BMI.

Dosage data for MoBa participants for the genetic variants relevant to each polygenic score were extracted from the final quality controlled -bfiles using PLINK, and .raw files imported to STATA. SNPs were harmonized by comparing effect alleles in the GWAS and reference alleles in MoBa. Where possible, alignment of palindromic SNPs (where alternative allele pairs are A/T or C/G) was determined by comparing allele frequencies of GWAS effect alleles and MoBa reference alleles. SNPs were considered same-aligned if the GWAS effect allele and MoBa reference allele were the same and their frequencies less than  $<0.05$  different. They were considered reverse-aligned if the GWAS effect allele and MoBa non-reference allele were the same, and their frequencies less than  $<0.05$  different. If the GWAS effect allele and MoBa reference allele were the same but their frequencies  $>0.05$  different, or GWAS effect allele and MoBa non-reference allele were the same but their frequencies  $>0.05$  different, or the effect allele frequency close to 0.50 (between 0.40 and 0.60) alignment was considered ambiguous. On this basis, 33 SNPs were excluded from the PGS for adult BMI, 9 from the PGS for childhood BMI, 2 from the depression PGS and 1 from the ADHD PGS. This left, respectively, 928, 314, 36, and 8 SNPs in the final polygenic scores.

Polygenic scores were calculated as the sum of the number of effect alleles (0,1, or 2) multiplied in each case by the harmonized SNP-coefficient from the GWAS. There was a very small amount of missingness in individual SNPs due to quality control measures. Among SNPs included in the adult BMI PGs, the mean proportion of individuals missing the SNP was 0.0002 and the maximum 0.002. For SNPs included in the childhood BMI PGs, equivalent values were 0.0003 and 0.003, for SNPs included in the depression PGs these were 0.0002 and 0.0006, and for SNPs included in the ADHD these were 0.0002 and 0.0007. Where individual SNP information was missing for an individual, the sample mean for the number of effect alleles (between 0 and 2) was added for that SNP.

## 6. Model equations

In within-family MR models, we used polygenic scores for all members of a child-mother-child trio to instrument the BMI of all three individuals. Within-families MR models were adjusted for child's sex, the first 20 principal components of ancestry for the child and both parents, and the genotyping batch of the child and both parents.

In Stata, this was specified in the form:

```
ivregress 2sls outcome (c_bmi m_bmi f_bmi = c_pgs m_pgs f_pgs) sex c_PC* m_PC* f_PC* c_batch* m_batch* f_batch*
```

This can be represented with the following equations:

The outcomes (depressive, anxiety, and ADHD symptoms) can be expressed as:

$$y_i = \beta_0 + \beta_1 X_{ic} + \beta_2 X_{im} + \beta_3 X_{if} + \beta_c C + e_i$$

The three exposures are offspring's, mother's, and father's BMI:

$$X_{ic} = \gamma_{oc} + \gamma_{1c} Z_{ic} + \gamma_{2c} Z_{im} + \gamma_{3c} Z_{if} + \gamma_{4c} C + v_{ic}$$

$$X_{im} = \gamma_{om} + \gamma_{1m} Z_{ic} + \gamma_{2m} Z_{im} + \gamma_{3m} Z_{if} + \gamma_{4m} C + v_{im}$$

$$X_{if} = \gamma_{of} + \gamma_{1f} Z_{ic} + \gamma_{2f} Z_{im} + \gamma_{3f} Z_{if} + \gamma_{4f} C + v_{if}$$

where:

$y_i$ =outcome

$X_{ic}$ =child's BMI

$X_{im}$ =mother's BMI

$X_{if}$ =father's BMI

$Z_{ic}$ =child's polygenic score

$Z_{im}$ =mother's polygenic score

$Z_{if}$ =father's polygenic score

$C$ =covariates including principal components for offspring, mother and father and genotyping batch.

$e_i$ = error term for the outcome equation

$v_{ic}$ = error term for the child exposure (BMI) equation

$v_{im}$ = error term for the mother exposure (BMI) equation

$v_{if}$ = error term for the father exposure (BMI) equation

## Supplementary Results

### 1. Comparison of analytic sample and excluded participants

To assess if participants included in the analytic sample (N=26,370) differed from others in the birth registry file (N=88,347) (Supplementary Figure 1), we conducted t-tests and chi-squared tests for key characteristics at birth, BMI, and outcomes using unimputed data. Reflecting the large size of the sample population, several differences reached statistical significance. Participants in the analytic sample had slightly higher birthweight (mean=3.6kg vs 3.5kg) and slightly younger parents (mean maternal age 30.0 vs 30.2 years, mean paternal 32.5 vs 32.8 years). Mothers and fathers included in the analytic sample had slightly higher educational qualifications (e.g., 24.3% and 23.8% of mothers and fathers respectively had 4 years of college education, against 23.0% and 22.8% for those not included). At the time of the child's birth, mothers in the analytic sample had fewer existing children (e.g., 47.7% vs 42.9% had none), were more likely to be married or cohabiting (97.4% vs 94.9%), and less likely to currently smoke (7.1% vs 8.8%). There was evidence of a difference in BMI for fathers (mean=25.9 vs 25.8) but not for mothers or children. Children in the analytic sample had slightly lower depressive symptoms (mean SMFQ=1.79 vs 1.89) and anxiety symptoms (mean SCARED=1.04 vs 1.00) but did not differ on ADHD symptoms. Descriptive characteristics of the full MoBa sample are in Supplementary Table S5.

**Supplementary Figure 1: Flow chart of inclusion and exclusion of MoBa participants into the study sample**

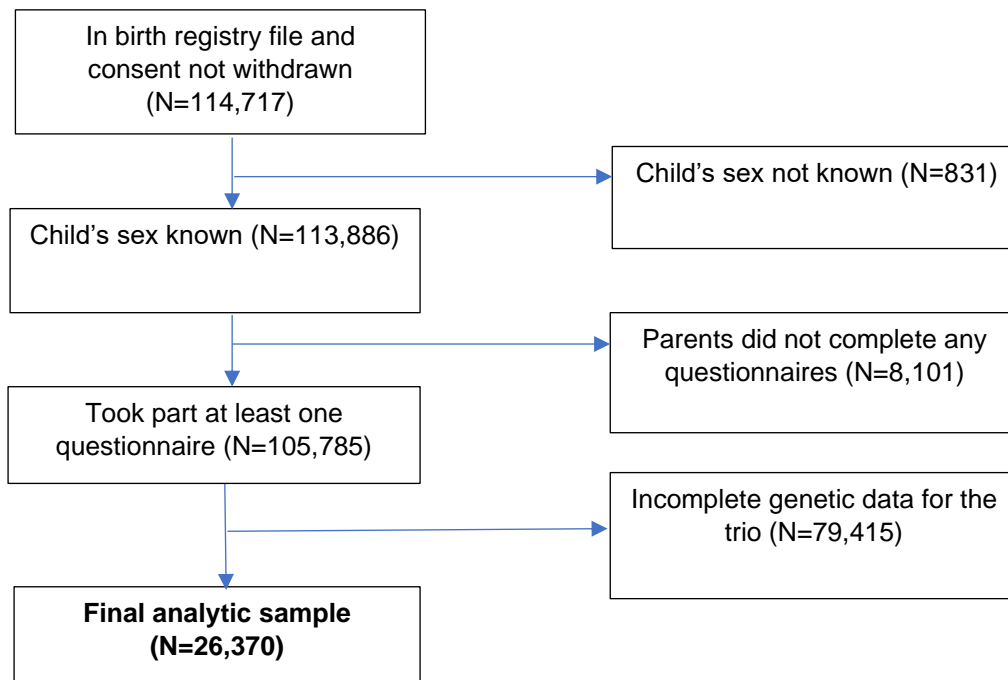

**Supplementary Table S5: Descriptive statistics of full MoBa sample (N=114,717)<sup>a</sup>**

| <b>Continuous variables</b>                                                                                                     |                                                     | <b>mean</b> | <b>SD</b>    | <b>N obs</b> |
|---------------------------------------------------------------------------------------------------------------------------------|-----------------------------------------------------|-------------|--------------|--------------|
| Maternal age at birth                                                                                                           |                                                     | 30.1        | 4.7          | 114,101      |
| Paternal age at birth                                                                                                           |                                                     | 32.7        | 5.5          | 113,579      |
| Maternal depressive/anxiety symptoms, based on 5 items from the Hopkins Symptoms Checklist-25 (SCL-25) <sup>b</sup>             |                                                     | 1.3         | 2.0          | 99,990       |
| Paternal depressive/anxiety symptoms, based on 8 items from the Hopkins Symptoms Checklist-25 (SCL-25) <sup>c</sup>             |                                                     | 1.2         | 2.1          | 76,679       |
| Maternal ADHD symptoms: adult ADHD self-report scale <sup>d</sup>                                                               |                                                     | 8.2         | 3.2          | 34,320       |
| Paternal ADHD symptoms: adult ADHD self-report scale <sup>e</sup>                                                               |                                                     | 6.6         | 3.5          | 56,061       |
| Maternal pre-pregnancy BMI (kg/m <sup>2</sup> )                                                                                 |                                                     | 24.0        | 4.1          | 100,770      |
| Paternal BMI (kg/m <sup>2</sup> )                                                                                               |                                                     | 25.8        | 3.2          | 100,315      |
| Child's BMI at age 8 (kg/m <sup>2</sup> )                                                                                       |                                                     | 16.2        | 2.0          | 37,035       |
| Child depressive symptoms age 8: Short Mood and Feelings Questionnaire (SMFQ) <sup>f</sup>                                      |                                                     | 1.9         | 2.4          | 42,407       |
| Child anxiety symptoms age 8: Screen for Child Anxiety Related Disorders (SCARED) <sup>g</sup>                                  |                                                     | 1.0         | 1.2          | 43,107       |
| Child ADHD symptoms age 8: Parent/Teacher Rating Scale for Disruptive Behaviour Disorders (RS-DBD) <sup>h</sup>                 |                                                     | 8.5         | 7.2          | 42,008       |
| Child ADHD symptoms (inattention) age 8: Parent/Teacher Rating Scale for Disruptive Behaviour Disorders (RS-DBD) <sup>i</sup>   |                                                     | 5.0         | 4.1          | 42,603       |
| Child ADHD symptoms (hyperactivity) age 8: Parent/Teacher Rating Scale for Disruptive Behaviour Disorders (RS-DBD) <sup>j</sup> |                                                     | 3.6         | 3.9          | 42,749       |
| <b>Categorical variables</b>                                                                                                    | <b>Category</b>                                     | <b>%</b>    | <b>N obs</b> |              |
| Child's sex                                                                                                                     | male                                                | 51.3        | 113,886      |              |
|                                                                                                                                 | female                                              | 48.7        |              |              |
| maternal educational qualifications                                                                                             | Elementary, some further education                  | 8.0         | 98,634       |              |
|                                                                                                                                 | Further education: vocational                       | 13.1        |              |              |
|                                                                                                                                 | Further education: general studies, sixth form      | 14.8        |              |              |
|                                                                                                                                 | Higher education: college/university, up to 4 years | 40.8        |              |              |
|                                                                                                                                 | Higher education: college/university, over 4 years  | 23.3        |              |              |
| paternal educational qualifications                                                                                             | Elementary, some further education                  | 11.5        | 100,245      |              |
|                                                                                                                                 | Further education: vocational                       | 26.5        |              |              |
|                                                                                                                                 | Further education: general studies, sixth form      | 12.7        |              |              |
|                                                                                                                                 | Higher education: college/university, up to 4 years | 26.2        |              |              |
|                                                                                                                                 | Higher education: college/university, over 4 years  | 23.0        |              |              |
| maternal parity at child's birth                                                                                                | 0                                                   | 44.0        | 114,101      |              |
|                                                                                                                                 | 1                                                   | 35.9        |              |              |
|                                                                                                                                 | 2                                                   | 15.5        |              |              |
|                                                                                                                                 | 3+                                                  | 4.5         |              |              |
| Mother's marital status at birth                                                                                                | Married/registered partner                          | 95.5        | 114,101      |              |
|                                                                                                                                 | single                                              | 4.5         |              |              |
| Mother's smoked during pregnancy                                                                                                | never                                               | 49.9        | 102,094      |              |



|                        |      |
|------------------------|------|
| Stopped before week 17 | 41.7 |
| Currently, sometimes   | 2.8  |
| Currently, daily       | 5.6  |

---

<sup>a</sup>All participants in the birth registry file who had not withdrawn consent. <sup>b</sup>Possible range: 0-15.

<sup>c</sup>Possible range: 0-24. <sup>d</sup>Possible range: 0-24. <sup>e</sup>Possible range: 0-24. <sup>f</sup>Possible range: 0-10. <sup>g</sup>Possible range: 0-54. <sup>h</sup>Possible range: 0-27. <sup>i</sup>Possible range: 0-27.

---

**Supplementary Table 6: Descriptive statistics of analytic sample (N=26,370)<sup>a</sup>, unimputed data**

| <b>Continuous variables</b>                                                                                                     |                                                     | <b>mean</b> | <b>SD</b> | <b>N obs</b> |
|---------------------------------------------------------------------------------------------------------------------------------|-----------------------------------------------------|-------------|-----------|--------------|
| Maternal age at birth                                                                                                           |                                                     | 30.0        | 4.4       | 26,370       |
| Paternal age at birth                                                                                                           |                                                     | 32.5        | 5.2       | 26,370       |
| Maternal depressive/anxiety symptoms, based on 5 items from the Hopkins Symptoms Checklist-25 (SCL-25) <sup>b</sup>             |                                                     | 1.2         | 1.9       | 25,341       |
| Paternal depressive/anxiety symptoms, based on 8 items from the Hopkins Symptoms Checklist-25 (SCL-25) <sup>c</sup>             |                                                     | 1.1         | 2.1       | 24,235       |
| Maternal ADHD symptoms: adult ADHD self-report scale <sup>d</sup>                                                               |                                                     | 8.2         | 3.1       | 10,586       |
| Paternal ADHD symptoms: adult ADHD self-report scale <sup>e</sup>                                                               |                                                     | 6.5         | 3.4       | 15,616       |
| Maternal pre-pregnancy BMI (kg/m <sup>2</sup> )                                                                                 |                                                     | 24.0        | 4.1       | 25,483       |
| Paternal BMI (kg/m <sup>2</sup> )                                                                                               |                                                     | 25.9        | 3.2       | 25,458       |
| Child's BMI at age 8 (kg/m <sup>2</sup> )                                                                                       |                                                     | 16.2        | 2.0       | 10,413       |
| Child depressive symptoms age 8: Short Mood and Feelings Questionnaire (SMFQ) <sup>f</sup>                                      |                                                     | 1.8         | 2.4       | 11,867       |
| Child anxiety symptoms age 8: Screen for Child Anxiety Related Disorders (SCARED) <sup>g</sup>                                  |                                                     | 1.0         | 1.2       | 12,032       |
| Child ADHD symptoms age 8: Parent/Teacher Rating Scale for Disruptive Behaviour Disorders (RS-DBD) <sup>h</sup>                 |                                                     | 8.5         | 7.3       | 11,771       |
| Child ADHD symptoms (inattention) age 8: Parent/Teacher Rating Scale for Disruptive Behaviour Disorders (RS-DBD) <sup>i</sup>   |                                                     | 4.9         | 4.1       | 11,921       |
| Child ADHD symptoms (hyperactivity) age 8: Parent/Teacher Rating Scale for Disruptive Behaviour Disorders (RS-DBD) <sup>j</sup> |                                                     | 3.5         | 3.9       | 11,978       |
| <b>Categorical variables</b>                                                                                                    | <b>Category</b>                                     |             | <b>%</b>  | <b>N obs</b> |
| Child's sex                                                                                                                     | male                                                |             | 51.5      | 26,370       |
|                                                                                                                                 | female                                              |             | 48.5      |              |
| maternal educational qualifications                                                                                             | Elementary, some further education                  |             | 6.3       | 24,849       |
|                                                                                                                                 | Further education: vocational                       |             | 12.6      |              |
|                                                                                                                                 | Further education: general studies, sixth form      |             | 14.1      |              |
|                                                                                                                                 | Higher education: college/university, up to 4 years |             | 42.7      |              |
|                                                                                                                                 | Higher education: college/university, over 4 years  |             | 24.3      |              |
| paternal educational qualifications                                                                                             | Elementary, some further education                  |             | 9.5       | 25,605       |
|                                                                                                                                 | Further education: vocational                       |             | 26.0      |              |
|                                                                                                                                 | Further education: general studies, sixth form      |             | 12.7      |              |
|                                                                                                                                 | Higher education: college/university, up to 4 years |             | 28.0      |              |
|                                                                                                                                 | Higher education: college/university, over 4 years  |             | 23.8      |              |
| maternal parity at child's birth                                                                                                | 0                                                   |             | 47.7      | 26,370       |
|                                                                                                                                 | 1                                                   |             | 35.1      |              |
|                                                                                                                                 | 2                                                   |             | 13.7      |              |
|                                                                                                                                 | 3+                                                  |             | 3.5       |              |
| Mother's marital status at birth                                                                                                | Married/registered partner                          |             | 97.4      | 26,370       |
|                                                                                                                                 | single                                              |             | 2.6       |              |
| Mother's smoked during pregnancy                                                                                                | never                                               |             | 51.2      | 25,988       |

|                        |      |
|------------------------|------|
| Stopped before week 17 | 41.7 |
| Currently, sometimes   | 2.5  |
| Currently, daily       | 4.7  |

---

<sup>a</sup>The reasons for exclusions and numbers in each case are shown in supplementary Figure 1. <sup>b</sup>Possible range: 0-15. <sup>c</sup>Possible range: 0-24. <sup>d</sup>Possible range: 0-24. <sup>e</sup>Possible range: 0-24. <sup>f</sup>Possible range: 0-10. <sup>g</sup>Possible range: 0-54. <sup>h</sup>Possible range: 0-27. <sup>i</sup>Possible range: 0-27.

---

**Table S7: BMI and symptoms of depression, anxiety and ADHD at age 8 in MoBa, adult BMI PGS (N=26,370)**

| Outcome                                                                                  |                        | Multivariable-adjusted estimate <sup>b</sup> |             | MR estimate <sup>c</sup>       |            | Within-families MR estimate <sup>c</sup> |            |
|------------------------------------------------------------------------------------------|------------------------|----------------------------------------------|-------------|--------------------------------|------------|------------------------------------------|------------|
|                                                                                          |                        | Beta (per 5kg/m <sup>2</sup> )               | CI          | Beta (per 5kg/m <sup>2</sup> ) | CI         | Beta (per 5kg/m <sup>2</sup> )           | CI         |
| Depressive symptoms: standardized SMFQ <sup>d</sup> score                                | Child BMI <sup>a</sup> | 0.04                                         | -0.01,0.09  | 0.41                           | 0.18,0.64  | 0.08                                     | -0.25,0.42 |
|                                                                                          | Mother's BMI           | 0.06                                         | 0.03,0.09   |                                |            | 0.16                                     | 0.06,0.26  |
|                                                                                          | Father's BMI           | 0.01                                         | -0.02,0.04  |                                |            | 0.02                                     | -0.13,0.16 |
| Anxiety symptoms: standardized SCARED <sup>e</sup> score                                 | Child BMI              | -0.06                                        | -0.11,-0.01 | -0.19                          | -0.42,0.03 | -0.16                                    | -0.49,0.17 |
|                                                                                          | Mother's BMI           | 0.01                                         | -0.01,0.03  |                                |            | 0.04                                     | -0.07,0.14 |
|                                                                                          | Father's BMI           | 0.01                                         | -0.02,0.04  |                                |            | -0.08                                    | -0.21,0.05 |
| ADHD symptoms: standardized RS-DBD <sup>f</sup> score, ADHD items                        | Child BMI              | -0.04                                        | -0.10,0.01  | 0.33                           | 0.10,0.56  | 0.08                                     | -0.25,0.40 |
|                                                                                          | Mother's BMI           | 0.04                                         | 0.02,0.07   |                                |            | 0.06                                     | -0.03,0.16 |
|                                                                                          | Father's BMI           | 0.03                                         | 0.00,0.05   |                                |            | 0.08                                     | -0.05,0.21 |
| ADHD-inattention symptoms: standardized RS-DBD <sup>f</sup> score, inattention items     | Child BMI              | -0.05                                        | -0.10,0.01  | 0.30                           | 0.06,0.54  | 0.13                                     | -0.20,0.46 |
|                                                                                          | Mother's BMI           | 0.05                                         | 0.02,0.07   |                                |            | 0.06                                     | -0.03,0.16 |
|                                                                                          | Father's BMI           | 0.03                                         | 0.00,0.06   |                                |            | 0.00                                     | -0.12,0.13 |
| ADHD-hyperactivity symptoms: standardized RS-DBD <sup>f</sup> score, hyperactivity items | Child BMI              | -0.03                                        | -0.08,0.02  | 0.30                           | 0.08,0.52  | 0.01                                     | -0.33,0.34 |
|                                                                                          | Mother's BMI           | 0.03                                         | 0.01,0.05   |                                |            | 0.05                                     | -0.05,0.14 |
|                                                                                          | Father's BMI           | 0.02                                         | -0.01,0.05  |                                |            | 0.14                                     | 0.01,0.27  |

<sup>a</sup>Coefficients represent S.D. change in symptoms per 5kg/m<sup>2</sup> increase in BMI. <sup>b</sup>Phenotypic models adjust for child's sex, mother's and father's educational qualifications, mother's and father's depressive/anxiety symptoms and ADHD symptoms, mother's and father's smoking status during pregnancy, and maternal parity. <sup>c</sup>Genetic models adjust for child's sex, genotyping batch, and the first 20 principal components of ancestry. <sup>d</sup>Short Mood and Feelings Questionnaire. <sup>e</sup>Screen for Child Anxiety Related Disorders. <sup>f</sup>Parent/Teacher Rating Scale for Disruptive Behaviour Disorders

**Table S8: BMI and symptoms of depression, anxiety and ADHD at age 8 in MoBa, childhood BMI PGS (N=26,370)**

| Outcome                                                                                  |                        | Multivariable-adjusted estimate <sup>b</sup> |             | MR estimate <sup>c</sup>       |            | Within-families MR estimate <sup>c</sup> |            |
|------------------------------------------------------------------------------------------|------------------------|----------------------------------------------|-------------|--------------------------------|------------|------------------------------------------|------------|
|                                                                                          |                        | Beta (per 5kg/m <sup>2</sup> )               | CI          | Beta (per 5kg/m <sup>2</sup> ) | CI         | Beta (per 5kg/m <sup>2</sup> )           | CI         |
| Depressive symptoms: standardized SMFQ <sup>d</sup> score                                | Child BMI <sup>a</sup> | 0.04                                         | -0.01,0.09  | 0.11                           | -0.08,0.30 | -0.14                                    | -0.43,0.14 |
|                                                                                          | Mother's BMI           | 0.06                                         | 0.03,0.09   |                                |            | 0.13                                     | 0.00,0.26  |
|                                                                                          | Father's BMI           | 0.01                                         | -0.02,0.04  |                                |            | 0.13                                     | -0.06,0.31 |
| Anxiety symptoms: standardized SCARED <sup>e</sup> score                                 | Child BMI              | -0.06                                        | -0.11,-0.01 | -0.13                          | -0.32,0.07 | -0.15                                    | -0.45,0.15 |
|                                                                                          | Mother's BMI           | 0.01                                         | -0.01,0.03  |                                |            | -0.01                                    | -0.14,0.13 |
|                                                                                          | Father's BMI           | 0.01                                         | -0.02,0.04  |                                |            | 0.04                                     | -0.16,0.24 |
| ADHD symptoms: standardized RS-DBD <sup>f</sup> score, ADHD items                        | Child BMI              | -0.04                                        | -0.10,0.01  | -0.03                          | -0.21,0.15 | -0.10                                    | -0.37,0.16 |
|                                                                                          | Mother's BMI           | 0.04                                         | 0.02,0.07   |                                |            | -0.03                                    | -0.15,0.10 |
|                                                                                          | Father's BMI           | 0.03                                         | 0.00,0.05   |                                |            | 0.09                                     | -0.09,0.26 |
| ADHD-inattention symptoms: standardized RS-DBD <sup>f</sup> score, inattention items     | Child BMI              | -0.05                                        | -0.10,0.01  | -0.02                          | -0.21,0.17 | -0.11                                    | -0.40,0.17 |
|                                                                                          | Mother's BMI           | 0.05                                         | 0.02,0.07   |                                |            | 0.00                                     | -0.13,0.12 |
|                                                                                          | Father's BMI           | 0.03                                         | 0.00,0.06   |                                |            | 0.08                                     | -0.10,0.27 |
| ADHD-hyperactivity symptoms: standardized RS-DBD <sup>f</sup> score, hyperactivity items | Child BMI              | -0.03                                        | -0.08,0.02  | -0.04                          | -0.21,0.14 | -0.08                                    | -0.34,0.19 |
|                                                                                          | Mother's BMI           | 0.03                                         | 0.01,0.05   |                                |            | -0.05                                    | -0.17,0.08 |
|                                                                                          | Father's BMI           | 0.02                                         | -0.01,0.05  |                                |            | 0.08                                     | -0.10,0.25 |

<sup>a</sup>Coefficients represent S.D. change in symptoms per 5kg/m<sup>2</sup> increase in BMI. <sup>b</sup>Phenotypic models adjust for child's sex, mother's and father's educational qualifications, mother's and father's depressive/anxiety symptoms and ADHD symptoms, mother's and father's smoking status during pregnancy, and maternal parity. <sup>c</sup>Genetic models adjust for child's sex, genotyping batch, and the first 20 principal components of ancestry. <sup>d</sup>Short Mood and Feelings Questionnaire. <sup>e</sup>Screen for Child Anxiety Related Disorders. <sup>f</sup>Parent/Teacher Rating Scale for Disruptive Behaviour Disorders.

| <b>Supplementary Table S9: Associations of polygenic scores between parental pairs.</b>                                                                                                    |                            |                    |                                |                   |                             |                    |                       |                    |
|--------------------------------------------------------------------------------------------------------------------------------------------------------------------------------------------|----------------------------|--------------------|--------------------------------|-------------------|-----------------------------|--------------------|-----------------------|--------------------|
|                                                                                                                                                                                            | <i>Father's: Adult BMI</i> |                    | <i>Father's: Childhood BMI</i> |                   | <i>Father's: Depression</i> |                    | <i>Father's: ADHD</i> |                    |
| <i>Mother's:</i>                                                                                                                                                                           | Correlation                | Beta (95%CI)       | Correlation                    | Beta (95%CI)      | Correlation                 | Beta (95%CI)       | Correlation           | Beta (95%CI)       |
| Adult BMI                                                                                                                                                                                  | 0.01                       | 0.02 (0.01,0.03)   | 0.02                           | 0.02 (0.01,0.03)  | -0.01                       | -0.01 (-0.02,0.01) | 0.01                  | 0.01 (-0.01,0.02)  |
| Childhood BMI                                                                                                                                                                              | 0.01                       | 0.01 (-0.01,0.02)  | 0.00                           | 0.00 (-0.01,0.01) | 0.02                        | 0.02 (0.00,0.03)   | 0.01                  | 0.01 (-0.00,0.02)  |
| Depression                                                                                                                                                                                 | -0.01                      | -0.01 (-0.02,0.01) | -0.00                          | 0.00 (-0.01,0.01) | 0.01                        | 0.01 (-0.01,0.02)  | -0.00                 | -0.00 (-0.01,0.01) |
| ADHD                                                                                                                                                                                       | -0.00                      | -0.00 (-0.02,0.01) | 0.00                           | 0.00 (-0.01,0.01) | -0.00                       | -0.00 (-0.02,0.01) | -0.00                 | -0.00 (-0.01,0.01) |
| Regression models regressed father's polygenic scores on mother's polygenic scores, adjusting for the genotyping batch and first 20 principal components of ancestry for both individuals. |                            |                    |                                |                   |                             |                    |                       |                    |

**Table S10: BMI and symptoms of depression, anxiety and ADHD at age 8 in MoBa, adult BMI PGS, log-transformed outcomes (N=26,370)**

| Outcome                                                                                     |                        | Multivariable-adjusted estimate <sup>b</sup> |             | MR estimate <sup>c</sup>       |            | Within-families MR estimate <sup>c</sup> |            |
|---------------------------------------------------------------------------------------------|------------------------|----------------------------------------------|-------------|--------------------------------|------------|------------------------------------------|------------|
|                                                                                             |                        | Beta (per 5kg/m <sup>2</sup> )               | CI          | Beta (per 5kg/m <sup>2</sup> ) | CI         | Beta (per 5kg/m <sup>2</sup> )           | CI         |
| Depressive symptoms: log-transformed SMFQ <sup>d</sup> score                                | Child BMI <sup>a</sup> | 0.03                                         | -0.00,0.07  | 0.30                           | 0.14,0.47  | 0.07                                     | -0.17,0.30 |
|                                                                                             | Mother's BMI           | 0.04                                         | 0.03,0.06   |                                |            | 0.11                                     | 0.04,0.18  |
|                                                                                             | Father's BMI           | 0.01                                         | -0.01,0.03  |                                |            | 0.03                                     | -0.07,0.12 |
| Anxiety symptoms: log-transformed SCARED <sup>e</sup> score                                 | Child BMI              | -0.03                                        | -0.05,-0.00 | -0.10                          | -0.22,0.02 | -0.09                                    | -0.26,0.09 |
|                                                                                             | Mother's BMI           | 0.00                                         | -0.01,0.02  |                                |            | 0.02                                     | -0.04,0.07 |
|                                                                                             | Father's BMI           | 0.01                                         | -0.01,0.02  |                                |            | -0.03                                    | -0.10,0.03 |
| ADHD symptoms: log-transformed RS-DBD <sup>f</sup> score                                    | Child BMI              | -0.03                                        | -0.07,0.01  | 0.29                           | 0.11,0.48  | 0.12                                     | -0.15,0.39 |
|                                                                                             | Mother's BMI           | 0.03                                         | 0.01,0.05   |                                |            | 0.04                                     | -0.03,0.12 |
|                                                                                             | Father's BMI           | 0.02                                         | 0.00,0.04   |                                |            | 0.06                                     | -0.05,0.16 |
| ADHD-inattention symptoms: log-transformed RS-DBD <sup>f</sup> score, inattention items     | Child BMI              | -0.03                                        | -0.06,0.01  | 0.23                           | 0.05,0.41  | 0.16                                     | -0.09,0.41 |
|                                                                                             | Mother's BMI           | 0.03                                         | 0.02,0.05   |                                |            | 0.04                                     | -0.04,0.11 |
|                                                                                             | Father's BMI           | 0.02                                         | 0.00,0.04   |                                |            | -0.01                                    | -0.11,0.08 |
| ADHD-hyperactivity symptoms: log-transformed RS-DBD <sup>f</sup> score, hyperactivity items | Child BMI              | -0.02                                        | -0.06,0.02  | 0.28                           | 0.09,0.47  | 0.00                                     | -0.29,0.29 |
|                                                                                             | Mother's BMI           | 0.02                                         | 0.00,0.04   |                                |            | 0.05                                     | -0.04,0.13 |
|                                                                                             | Father's BMI           | 0.02                                         | -0.01,0.04  |                                |            | 0.14                                     | 0.03,0.26  |

<sup>a</sup>Coefficients represent change in symptoms, log-transformed after adding 1, per 5kg/m<sup>2</sup> increase in BMI. <sup>b</sup>Phenotypic models adjust for child's sex, mother's and father's educational qualifications, mother's and father's depressive/anxiety symptoms and ADHD symptoms, mother's and father's smoking status during pregnancy, and maternal parity. <sup>c</sup>Genetic models adjust for child's sex, genotyping batch, and the first 20 principal components of ancestry. <sup>d</sup>Short Mood and Feelings Questionnaire. <sup>e</sup>Screen for Child Anxiety Related Disorders.

<sup>f</sup>Parent/Teacher Rating Scale for Disruptive Behaviour Disorders.

**Table S11: BMI and symptoms of depression, anxiety and ADHD at age 8 in MoBa, childhood BMI PGS, log-transformed outcomes (N=26,370)**

| Outcome                                                                                     |                        | Multivariable-adjusted estimate <sup>b</sup> |             | MR estimate <sup>c</sup>       |            | Within-families MR estimate <sup>c</sup> |            |
|---------------------------------------------------------------------------------------------|------------------------|----------------------------------------------|-------------|--------------------------------|------------|------------------------------------------|------------|
|                                                                                             |                        | Beta (per 5kg/m <sup>2</sup> )               | CI          | Beta (per 5kg/m <sup>2</sup> ) | CI         | Beta (per 5kg/m <sup>2</sup> )           | CI         |
| Depressive symptoms: log-transformed SMFQ <sup>d</sup> score                                | Child BMI <sup>a</sup> | 0.03                                         | -0.00,0.07  | 0.10                           | -0.04,0.23 | -0.07                                    | -0.27,0.13 |
|                                                                                             | Mother's BMI           | 0.04                                         | 0.03,0.06   |                                |            | 0.08                                     | -0.01,0.18 |
|                                                                                             | Father's BMI           | 0.01                                         | -0.01,0.03  |                                |            | 0.09                                     | -0.05,0.22 |
| Anxiety symptoms: log-transformed SCARED <sup>e</sup> score                                 | Child BMI              | -0.03                                        | -0.05,-0.00 | -0.06                          | -0.16,0.04 | -0.07                                    | -0.23,0.09 |
|                                                                                             | Mother's BMI           | 0.00                                         | -0.01,0.02  |                                |            | -0.01                                    | -0.08,0.06 |
|                                                                                             | Father's BMI           | 0.01                                         | -0.01,0.02  |                                |            | 0.02                                     | -0.09,0.12 |
| ADHD symptoms: log-transformed RS-DBD <sup>f</sup> score                                    | Child BMI              | -0.03                                        | -0.07,0.01  | -0.01                          | -0.17,0.15 | -0.05                                    | -0.27,0.18 |
|                                                                                             | Mother's BMI           | 0.03                                         | 0.01,0.05   |                                |            | -0.03                                    | -0.13,0.07 |
|                                                                                             | Father's BMI           | 0.02                                         | 0.00,0.04   |                                |            | 0.06                                     | -0.08,0.21 |
| ADHD-inattention symptoms: log-transformed RS-DBD <sup>f</sup> score, inattention items     | Child BMI              | -0.03                                        | -0.06,0.01  | -0.01                          | -0.16,0.14 | -0.06                                    | -0.28,0.16 |
|                                                                                             | Mother's BMI           | 0.03                                         | 0.02,0.05   |                                |            | -0.01                                    | -0.11,0.09 |
|                                                                                             | Father's BMI           | 0.02                                         | 0.00,0.04   |                                |            | 0.06                                     | -0.08,0.19 |
| ADHD-hyperactivity symptoms: log-transformed RS-DBD <sup>f</sup> score, hyperactivity items | Child BMI              | -0.02                                        | -0.06,0.02  | -0.01                          | -0.16,0.14 | -0.03                                    | -0.26,0.20 |
|                                                                                             | Mother's BMI           | 0.02                                         | 0.00,0.04   |                                |            | -0.04                                    | -0.15,0.07 |
|                                                                                             | Father's BMI           | 0.02                                         | -0.01,0.04  |                                |            | 0.06                                     | -0.09,0.21 |

<sup>a</sup>Coefficients represent change in symptoms, log-transformed after adding 1, per 5kg/m<sup>2</sup> increase in BMI. <sup>b</sup>Phenotypic models adjust for child's sex, mother's and father's educational qualifications, mother's and father's depressive/anxiety symptoms and ADHD symptoms, mother's and father's smoking status during pregnancy, and maternal parity. <sup>c</sup>Genetic models adjust for child's sex, genotyping batch, and the first 20 principal components of ancestry. <sup>d</sup>Short Mood and Feelings Questionnaire. <sup>e</sup>Screen for Child Anxiety Related Disorders.

<sup>f</sup>Parent/Teacher Rating Scale for Disruptive Behaviour Disorders.



**Table S12: Robustness checks based on SNP-specific associations with child's BMI<sup>a</sup> and outcomes: SNPs in adult BMI polygenic score**

|                                                                       | Inverse-variance weighted |        | MR-Egger: slope |      | MR-Egger: intercept |      | MR-Median |      | MR-Modal |      |  |
|-----------------------------------------------------------------------|---------------------------|--------|-----------------|------|---------------------|------|-----------|------|----------|------|--|
|                                                                       | Beta                      | p      | Beta            | p    | Beta                | p    | Beta      | p    | Beta     | p    |  |
| <i>For classic MR models</i>                                          |                           |        |                 |      |                     |      |           |      |          |      |  |
| Depressive symptoms: standardized SMFQ <sup>b</sup> score             | 0.11                      | <0.001 | 0.05            | 0.54 | 0.00                | 0.44 | 0.11      | 0.01 | -0.01    | 0.89 |  |
| Anxiety symptoms: standardized SCARED <sup>c</sup> score              | -0.05                     | <0.001 | -0.12           | 0.14 | 0.00                | 0.38 | -0.06     | 0.14 | -0.05    | 0.62 |  |
| ADHD symptoms: standardized RS-DBD <sup>d</sup> score                 | 0.09                      | <0.001 | 0.01            | 0.90 | 0.00                | 0.28 | 0.06      | 0.11 | -0.03    | 0.77 |  |
| ADHD symptoms (inattention): standardized RS-DBD <sup>d</sup> score   | 0.08                      | <0.001 | -0.02           | 0.82 | 0.00                | 0.18 | 0.07      | 0.06 | 0.07     | 0.52 |  |
| ADHD symptoms (hyperactivity): standardized RS-DBD <sup>d</sup> score | 0.08                      | <0.001 | 0.04            | 0.61 | 0.00                | 0.59 | 0.09      | 0.02 | 0.06     | 0.55 |  |
|                                                                       | Inverse-variance weighted |        | MR-Egger: slope |      | MR-Egger: intercept |      | MR-Median |      | MR-Modal |      |  |
|                                                                       | Beta                      | p      | Beta            | p    | Beta                | p    | Beta      | p    | Beta     | p    |  |
| <i>For within-families MR models</i>                                  |                           |        |                 |      |                     |      |           |      |          |      |  |
| Depressive symptoms: standardized SMFQ <sup>b</sup> score             | 0.02                      | 0.27   | -0.13           | 0.26 | 0.00                | 0.15 | -0.03     | 0.58 | -0.12    | 0.35 |  |
| Anxiety symptoms: standardized SCARED <sup>c</sup> score              | -0.04                     | 0.05   | -0.09           | 0.41 | 0.00                | 0.62 | -0.03     | 0.56 | -0.02    | 0.88 |  |
| ADHD symptoms: standardized RS-DBD <sup>d</sup> score                 | 0.02                      | 0.35   | -0.06           | 0.58 | 0.00                | 0.43 | 0.02      | 0.73 | 0.06     | 0.69 |  |
| ADHD symptoms (inattention): standardized RS-DBD <sup>d</sup> score   | 0.03                      | 0.11   | -0.07           | 0.48 | 0.00                | 0.28 | 0.02      | 0.76 | -0.01    | 0.93 |  |
| ADHD symptoms (hyperactivity): standardized RS-DBD <sup>d</sup> score | 0.00                      | 0.94   | -0.03           | 0.81 | 0.00                | 0.78 | 0.00      | 0.98 | -0.04    | 0.74 |  |

<sup>a</sup>In the main analyses, all coefficients are expressed in terms of S.D. change in symptoms per 5kg/m<sup>2</sup> increase in BMI. In robustness checks, SNP-exposure associations were taken directly from the relevant GWAS. Coefficients above for BMI-outcome associations are therefore on the scale of kg/m<sup>2</sup>. <sup>b</sup>Short Mood and Feelings Questionnaire. <sup>c</sup>Screen for Child Anxiety Related Disorders. <sup>d</sup>Parent/Teacher Rating Scale for Disruptive Behaviour Disorders.

**Table S13: Robustness checks based on SNP-specific associations with child's BMI<sup>a</sup> and outcomes: SNPs in childhood BMI polygenic score**

|                                                                       | <b>Inverse-variance weighted</b> |      | <b>MR-Egger: slope</b> |      | <b>MR-Egger: intercept</b> |      | <b>MR-Median</b> |      | <b>MR-Modal</b> |      |
|-----------------------------------------------------------------------|----------------------------------|------|------------------------|------|----------------------------|------|------------------|------|-----------------|------|
| <i>For classic MR models</i>                                          |                                  |      |                        |      |                            |      |                  |      |                 |      |
| Depressive symptoms: standardized SMFQ <sup>b</sup> score             | 0.02                             | 0.27 | -0.13                  | 0.26 | 0.00                       | 0.15 | -0.03            | 0.58 | -0.12           | 0.35 |
| Anxiety symptoms: standardized SCARED <sup>c</sup> score              | -0.04                            | 0.05 | -0.09                  | 0.41 | 0.00                       | 0.62 | -0.03            | 0.56 | -0.02           | 0.88 |
| ADHD symptoms: standardized RS-DBD <sup>d</sup> score                 | 0.02                             | 0.35 | -0.06                  | 0.58 | 0.00                       | 0.43 | 0.02             | 0.73 | 0.06            | 0.69 |
| ADHD symptoms (inattention): standardized RS-DBD <sup>d</sup> score   | 0.03                             | 0.11 | -0.07                  | 0.48 | 0.00                       | 0.28 | 0.02             | 0.76 | -0.01           | 0.93 |
| ADHD symptoms (hyperactivity): standardized RS-DBD <sup>d</sup> score | 0.00                             | 0.94 | -0.03                  | 0.81 | 0.00                       | 0.78 | 0.00             | 0.98 | -0.04           | 0.74 |
|                                                                       | <b>Inverse-variance weighted</b> |      | <b>MR-Egger: slope</b> |      | <b>MR-Egger: intercept</b> |      | <b>MR-Median</b> |      | <b>MR-Modal</b> |      |
|                                                                       | Beta                             | p    | Beta                   | p    | Beta                       | p    | Beta             | p    | Beta            | p    |
| <i>For within-families MR models</i>                                  |                                  |      |                        |      |                            |      |                  |      |                 |      |
| Depressive symptoms: standardized SMFQ <sup>b</sup> score             | -0.08                            | 0.04 | -0.04                  | 0.83 | 0.00                       | 0.77 | -0.10            | 0.41 | -0.08           | 0.64 |
| Anxiety symptoms: standardized SCARED <sup>c</sup> score              | -0.08                            | 0.05 | -0.14                  | 0.43 | 0.00                       | 0.78 | -0.09            | 0.49 | -0.10           | 0.55 |
| ADHD symptoms: standardized RS-DBD <sup>d</sup> score                 | -0.06                            | 0.15 | 0.00                   | 1.00 | 0.00                       | 0.66 | -0.10            | 0.38 | -0.09           | 0.57 |
| ADHD symptoms (inattention): standardized RS-DBD <sup>d</sup> score   | -0.06                            | 0.12 | 0.01                   | 0.96 | 0.00                       | 0.60 | -0.07            | 0.51 | -0.08           | 0.63 |
| ADHD symptoms (hyperactivity): standardized RS-DBD <sup>d</sup> score | -0.04                            | 0.30 | 0.00                   | 0.99 | 0.00                       | 0.80 | -0.07            | 0.52 | 0.03            | 0.85 |

<sup>a</sup>In the main analyses, all coefficients are expressed in terms of S.D. change in symptoms per 5kg/m<sup>2</sup> increase in BMI. In robustness checks, SNP-exposure associations were taken directly from the relevant GWAS. Coefficients above for BMI-outcome associations are therefore on the scale of kg/m<sup>2</sup>. <sup>b</sup>Short Mood and Feelings Questionnaire. <sup>c</sup>Screen for Child Anxiety Related Disorders. <sup>d</sup>Parent/Teacher Rating Scale for Disruptive Behaviour Disorders.

**Table S14: BMI and symptoms of depression, anxiety and ADHD at age 8 in MoBa, adult BMI PGS, complete-case analysis**

| Outcome                                                                                            |                        | Multivariable-adjusted estimate <sup>b</sup> |            | MR estimate <sup>c</sup>       |            | Within-families MR estimate <sup>c</sup> |            |
|----------------------------------------------------------------------------------------------------|------------------------|----------------------------------------------|------------|--------------------------------|------------|------------------------------------------|------------|
|                                                                                                    |                        | Beta (per 5kg/m <sup>2</sup> )               | CI         | Beta (per 5kg/m <sup>2</sup> ) | CI         | Beta (per 5kg/m <sup>2</sup> )           | CI         |
| Depressive symptoms: standardized SMFQ <sup>d</sup> score<br>N=3120                                | Child BMI <sup>a</sup> | 0.10                                         | 0.01,0.19  | 0.27                           | -0.24,0.77 | 0.16                                     | -0.61,0.93 |
|                                                                                                    | Mother's BMI           |                                              |            |                                |            | 0.05                                     | -0.15,0.26 |
|                                                                                                    | Father's BMI           |                                              |            |                                |            | 0.04                                     | -0.21,0.29 |
| Anxiety symptoms: standardized SCARED <sup>e</sup> score<br>N=3147                                 | Child BMI              | -0.02                                        | -0.12,0.07 | -0.25                          | -0.79,0.28 | -0.09                                    | -0.98,0.8  |
|                                                                                                    | Mother's BMI           |                                              |            |                                |            | 0.18                                     | -0.06,0.41 |
|                                                                                                    | Father's BMI           |                                              |            |                                |            | -0.32                                    | -0.63,0.00 |
| ADHD symptoms: standardized RS-DBD <sup>f</sup> score, ADHD items<br>N=3016                        | Child BMI              | 0.03                                         | -0.06,0.12 | 0.29                           | -0.24,0.82 | 0.12                                     | -0.62,0.87 |
|                                                                                                    | Mother's BMI           |                                              |            |                                |            | 0.00                                     | -0.19,0.19 |
|                                                                                                    | Father's BMI           |                                              |            |                                |            | 0.11                                     | -0.16,0.38 |
| ADHD-inattention symptoms: standardized RS-DBD <sup>f</sup> score, inattention items<br>N=3139     | Child BMI              | 0.03                                         | -0.05,0.12 | 0.38                           | -0.16,0.91 | 0.47                                     | -0.29,1.23 |
|                                                                                                    | Mother's BMI           |                                              |            |                                |            | -0.02                                    | -0.22,0.17 |
|                                                                                                    | Father's BMI           |                                              |            |                                |            | -0.05                                    | -0.33,0.23 |
| ADHD-hyperactivity symptoms: standardized RS-DBD <sup>f</sup> score, hyperactivity items<br>N=3148 | Child BMI              | 0.03                                         | -0.06,0.12 | 0.11                           | -0.43,0.64 | -0.31                                    | -1.11,0.5  |
|                                                                                                    | Mother's BMI           |                                              |            |                                |            | 0.05                                     | -0.17,0.26 |
|                                                                                                    | Father's BMI           |                                              |            |                                |            | 0.24                                     | -0.05,0.52 |

<sup>a</sup>Coefficients represent S.D. change in symptoms per 5kg/m<sup>2</sup> increase in BMI. <sup>b</sup>Phenotypic models adjust for child's sex, mother's and father's educational qualifications, mother's and father's depressive/anxiety symptoms and ADHD symptoms, mother's and father's smoking status during pregnancy, and maternal parity. <sup>c</sup>Genetic models adjust for child's sex, genotyping batch, and the first 20 principal components of ancestry. <sup>d</sup>Short Mood and Feelings Questionnaire. <sup>e</sup>Screen for Child Anxiety Related Disorders. <sup>f</sup>Parent/Teacher Rating Scale for Disruptive Behaviour Disorders.

**Table S15: BMI and symptoms of depression, anxiety and ADHD at age 8 in MoBa, childhood BMI PGS, complete-case analysis**

| Outcome                                                                                            |                        | Multivariable-adjusted estimate <sup>b</sup> |            | MR estimate <sup>c</sup>       |            | Within-families MR estimate <sup>c</sup> |            |
|----------------------------------------------------------------------------------------------------|------------------------|----------------------------------------------|------------|--------------------------------|------------|------------------------------------------|------------|
|                                                                                                    |                        | Beta (per 5kg/m <sup>2</sup> )               | CI         | Beta (per 5kg/m <sup>2</sup> ) | CI         | Beta (per 5kg/m <sup>2</sup> )           | CI         |
| Depressive symptoms: standardized SMFQ <sup>d</sup> score<br>N=3120                                | Child BMI <sup>a</sup> | 0.10                                         | 0.01,0.19  | 0.16                           | -0.21,0.54 | -0.15                                    | -0.8,0.50  |
|                                                                                                    | Mother's BMI           |                                              |            |                                |            | -0.04                                    | -0.3,0.22  |
|                                                                                                    | Father's BMI           |                                              |            |                                |            | 0.31                                     | -0.07,0.68 |
| Anxiety symptoms: standardized SCARED <sup>e</sup> score<br>N=3147                                 | Child BMI              | -0.02                                        | -0.12,0.07 | -0.06                          | -0.47,0.35 | -0.06                                    | -0.76,0.65 |
|                                                                                                    | Mother's BMI           |                                              |            |                                |            | -0.04                                    | -0.33,0.25 |
|                                                                                                    | Father's BMI           |                                              |            |                                |            | 0.07                                     | -0.31,0.46 |
| ADHD symptoms: standardized RS-DBD <sup>f</sup> score, ADHD items<br>N=3016                        | Child BMI              | 0.03                                         | -0.06,0.12 | 0.20                           | -0.2,0.6   | 0.11                                     | -0.57,0.79 |
|                                                                                                    | Mother's BMI           |                                              |            |                                |            | -0.19                                    | -0.47,0.08 |
|                                                                                                    | Father's BMI           |                                              |            |                                |            | 0.20                                     | -0.17,0.57 |
| ADHD-inattention symptoms: standardized RS-DBD <sup>f</sup> score, inattention items<br>N=3139     | Child BMI              | 0.03                                         | -0.05,0.12 | 0.09                           | -0.31,0.48 | 0.05                                     | -0.62,0.72 |
|                                                                                                    | Mother's BMI           |                                              |            |                                |            | -0.14                                    | -0.41,0.14 |
|                                                                                                    | Father's BMI           |                                              |            |                                |            | 0.11                                     | -0.28,0.5  |
| ADHD-hyperactivity symptoms: standardized RS-DBD <sup>f</sup> score, hyperactivity items<br>N=3148 | Child BMI              | 0.03                                         | -0.06,0.12 | 0.26                           | -0.15,0.67 | 0.12                                     | -0.58,0.82 |
|                                                                                                    | Mother's BMI           |                                              |            |                                |            | -0.2                                     | -0.48,0.09 |
|                                                                                                    | Father's BMI           |                                              |            |                                |            | 0.25                                     | -0.12,0.63 |

<sup>a</sup>Coefficients represent S.D. change in symptoms per 5kg/m<sup>2</sup> increase in BMI. <sup>b</sup>Phenotypic models adjust for child's sex, mother's and father's educational qualifications, mother's and father's depressive/anxiety symptoms and ADHD symptoms, mother's and father's smoking status during pregnancy, and maternal parity. <sup>c</sup>Genetic models adjust for child's sex, genotyping batch, and the first 20 principal components of ancestry. <sup>d</sup>Short Mood and Feelings Questionnaire. <sup>e</sup>Screen for Child Anxiety Related Disorders. <sup>f</sup>Parent/Teacher Rating Scale for Disruptive Behaviour Disorders.

| <b>Table S16: Multivariable-adjusted associations<sup>a</sup> of BMI quintiles with symptoms of depression, anxiety, and ADHD at age 8 in MoBa</b> |                                                           |                                                          |                                                                   |                                                                                      |                                                                                          |
|----------------------------------------------------------------------------------------------------------------------------------------------------|-----------------------------------------------------------|----------------------------------------------------------|-------------------------------------------------------------------|--------------------------------------------------------------------------------------|------------------------------------------------------------------------------------------|
|                                                                                                                                                    | Depressive symptoms: standardized SMFQ <sup>b</sup> score | Anxiety symptoms: standardized SCARED <sup>c</sup> score | ADHD symptoms: standardized RS-DBD <sup>d</sup> score, ADHD items | ADHD-inattention symptoms: standardized RS-DBD <sup>d</sup> score, inattention items | ADHD-hyperactivity symptoms: standardized RS-DBD <sup>d</sup> score, hyperactivity items |
| <b>BMI quintile</b>                                                                                                                                | Beta <sup>e</sup> (95%CI)                                 | Beta <sup>e</sup> (95%CI)                                | Beta <sup>e</sup> (95%CI)                                         | Beta <sup>e</sup> (95%CI)                                                            | Beta <sup>e</sup> (95%CI)                                                                |
| 1                                                                                                                                                  | 0.01 (-0.05,0.06)                                         | 0.03 (-0.02,0.08)                                        | 0.03 (-0.02,0.08)                                                 | 0.03 (-0.02,0.08)                                                                    | 0.03 (-0.02,0.08)                                                                        |
| 2                                                                                                                                                  | 0.01 (-0.04,0.06)                                         | 0.01 (-0.04,0.06)                                        | 0.01 (-0.04,0.06)                                                 | 0.01 (-0.04,0.06)                                                                    | 0.01 (-0.04,0.06)                                                                        |
| 3 (ref)                                                                                                                                            | 1                                                         | 1                                                        | 1                                                                 | 1                                                                                    | 1                                                                                        |
| 4                                                                                                                                                  | 0.02 (-0.03,0.07)                                         | -0.03 (-0.08,0.03)                                       | -0.00 (-0.05,0.04)                                                | -0.01 (-0.05,0.04)                                                                   | 0.00 (-0.05,0.04)                                                                        |
| 5                                                                                                                                                  | 0.04 (-0.01,0.10)                                         | -0.04 (-0.09,0.02)                                       | -0.03 (-0.08,0.03)                                                | -0.03 (-0.08,0.02)                                                                   | -0.02 (-0.07,0.03)                                                                       |

<sup>a</sup>Models adjust for child's sex, mother's and father's educational qualifications, mother's and father's depressive/anxiety symptoms and ADHD symptoms, mother's and father's smoking status during pregnancy, and maternal parity. <sup>b</sup>Short Mood and Feelings Questionnaire. <sup>c</sup>Screen for Child Anxiety Related Disorders. <sup>d</sup>Parent/Teacher Rating Scale for Disruptive Behaviour Disorders. <sup>e</sup>Coefficients represent S.D. difference in symptoms between quintiles of child's BMI.

1. Manichaikul A, Mychaleckyj JC, Rich SS, Daly K, Sale M, Chen WM. Robust relationship inference in genome-wide association studies. *Bioinformatics*. 2010;26(22):2867–73.
2. Yengo L, Sidorenko J, Kemper KE, Zheng Z, Wood AR, Weedon MN, et al. Meta-analysis of genome-wide association studies for height and body mass index in ~700000 individuals of European ancestry. *Hum Mol Genet* [Internet]. 2018 Aug 16;27(20):3641–9. Available from: <https://doi.org/10.1093/hmg/ddy271>
3. Richardson TG, Sanderson E, Elsworth B, Tilling K, Davey Smith G. Use of genetic variation to separate the effects of early and later life adiposity on disease risk: mendelian randomisation study. *BMJ* [Internet]. 2020 May 6;369:m1203. Available from: <http://www.bmj.com/content/369/bmj.m1203.abstract>
4. Wray NR, Ripke S, Mattheisen M, Trzaskowski M, Byrne EM, Abdellaoui A, et al. Genome-wide association analyses identify 44 risk variants and refine the genetic architecture of major depression. *Nat Genet*. 2018;
5. Demontis D, Walters RK, Martin J, Mattheisen M, Als TD, Agerbo E, et al. Discovery of the first genome-wide significant risk loci for attention deficit/hyperactivity disorder. *Nat Genet*. 2019;
6. Hemani G, Zheng J, Elsworth B, Wade KH, Haberland V, Baird D, et al. The MR-base platform supports systematic causal inference across the human phenome. *Elife*. 2018;
7. Hesbacher PT, Rickels K, Morris RJ, Newman H, Rosenfeld H. Psychiatric illness in family practice. *J Clin Psychiatry*. 1980 Jan;41(1):6–10.
8. Kessler RC, Adler L, Ames M, Demler O, Faraone S, Hiripi E, et al. The World Health Organization Adult ADHD Self-Report Scale (ASRS): a short screening scale for use in the general population. *Psychol Med*. 2005 Feb;35(2):245–56.
